# Supplementary material for: A hybrid polyvinyl alcohol/molybdenum disulfide nanosheet hydrogel with light-triggered rapid self-healing capability
Source: Royal Society of Chemistry journal article supplement (doi:10.1039/d0tb02830d), 2021-01-01
Supplement: d0tb02830d1.pdf [file d0tb02830d1.pdf]

## Supporting Information

### **Hybrid polyvinyl alcohol/molybdenum disulfide nanosheets hydrogel with light-triggered rapid self-healing capability**

*Wen Jing Yang, Xiaodong Wang, Rui Zhang, Yuxin Wang, Qiu Qiu, Lihui Yuwen,\* Lianhui Wang\**

Key Laboratory for Organic Electronics and Information Displays & Jiangsu Key Laboratory for Biosensor, Institute of Advanced Materials (IAM), Jiangsu National Synergistic Innovation Center for Advanced Materials (SICAM), Nanjing University of Posts and Telecommunications, Nanjing, 210023, China

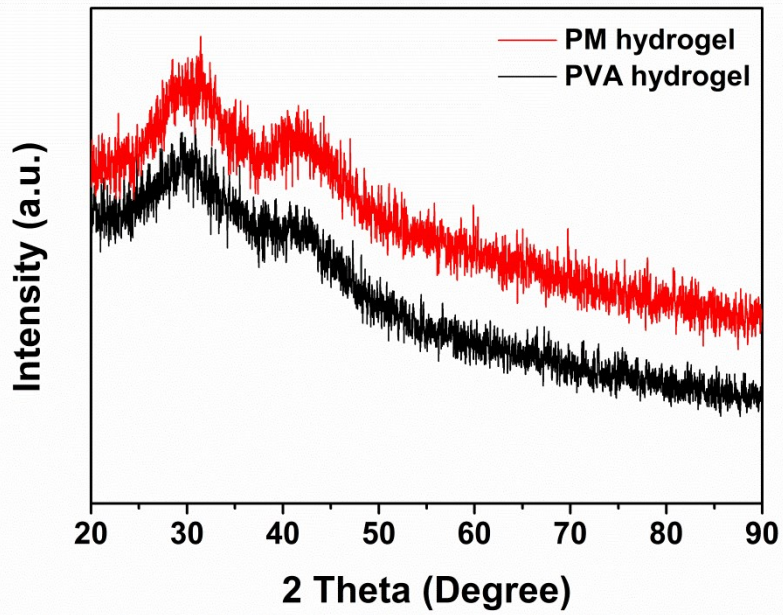

**Figure S1 The XRD patterns of the PM hydrogel and PVA hydrogel.**

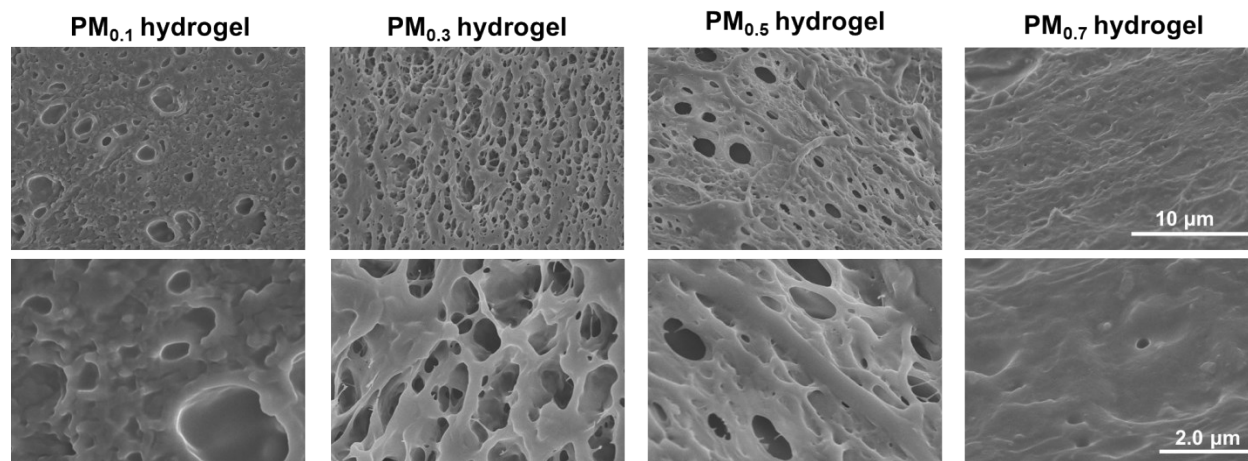

**Figure S2** The SEM images for the inner morphologies of PM hydrogels with different ce-MoS<sub>2</sub> loadings.

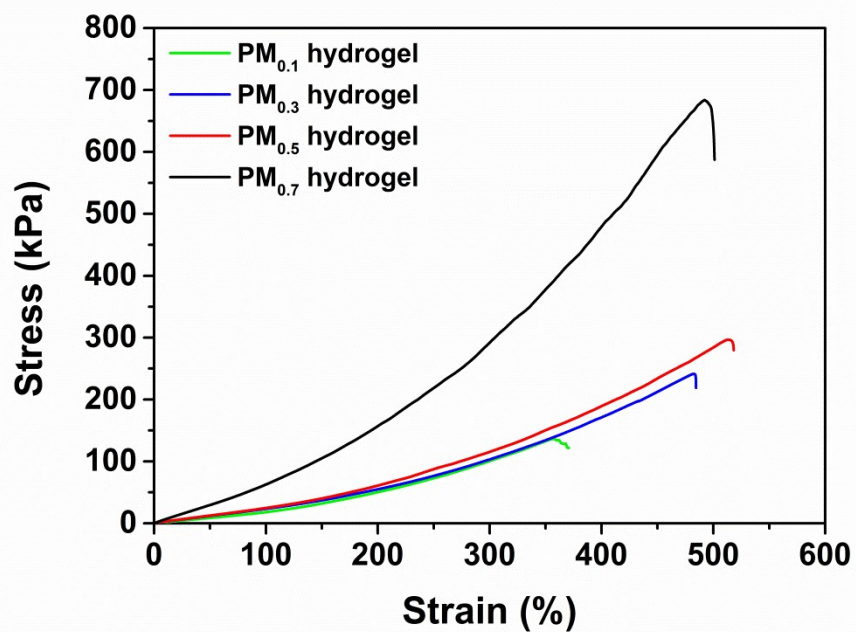

Figure S3 The stress-strain curves for the PM hydrogels with different ce-MoS<sub>2</sub> loadings.

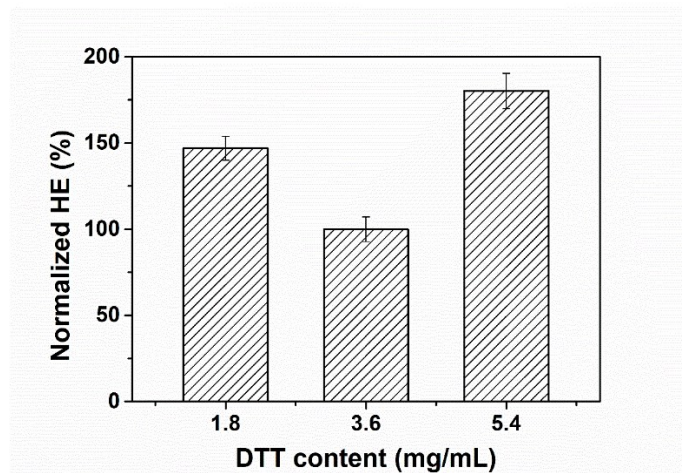

**Figure S4** The normalized healing efficiency of the PM hydrogels with different DTT content of 1.8, 3.6 and 5.4 mg/mL.

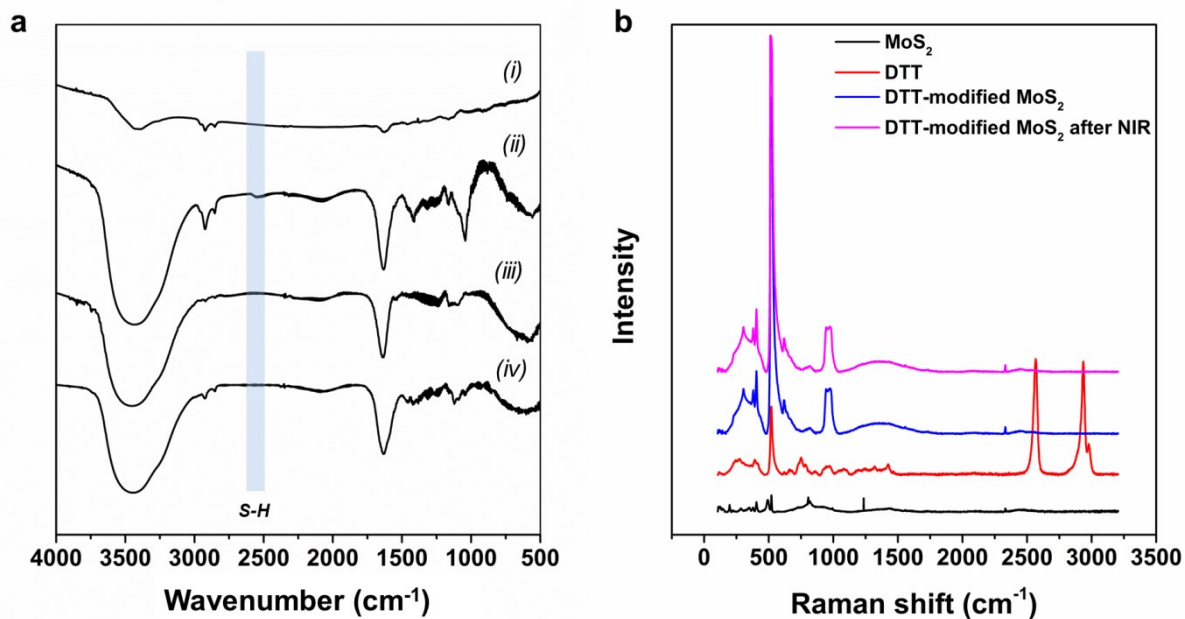

**Figure S5 (a) The FT-IR absorption spectra of (i) MoS<sub>2</sub> nanosheets, (ii) DTT, (iii) DTT modified MoS<sub>2</sub> nanosheets and (iv) DTT modified MoS<sub>2</sub> nanosheets after NIR light irradiation. (b) The Raman spectra of MoS<sub>2</sub> nanosheets, DTT, DTT modified MoS<sub>2</sub> nanosheets and DTT modified MoS<sub>2</sub> nanosheets after NIR light irradiation.**

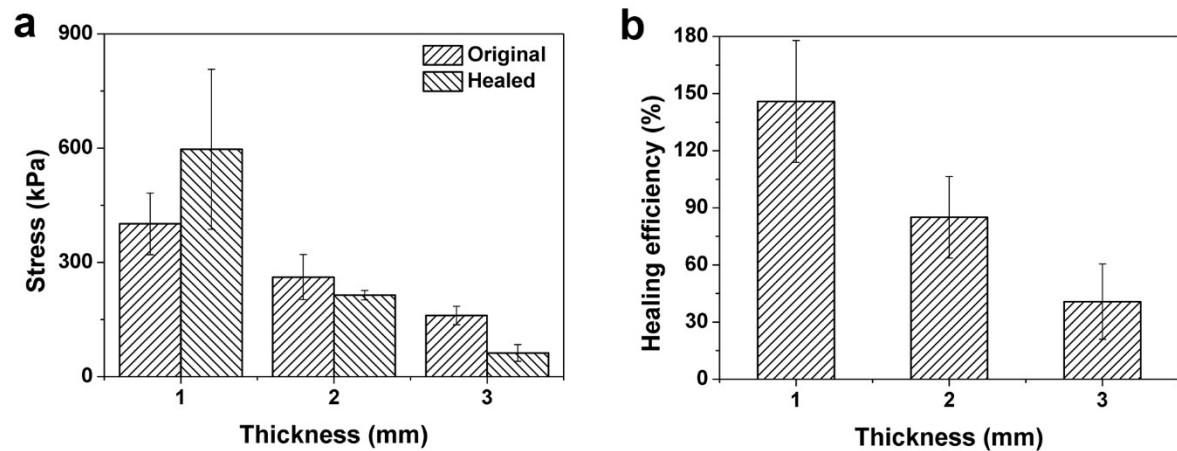

**Figure S6 (a) The fracture stress of the original and healed PM hydrogels with different thickness of 1, 2 and 3 mm. (b) The healing efficiency of the PM hydrogels with different thickness of 1, 2 and 3 mm.**

**Table S1 Comparison of healing efficiency with other PVA-based hydrogel and hydrogen-bond based hydrogels**

| Hydrogel                                                         | Healing time       | Healing efficiency (%) | Separation time | Healing efficiency after separation (%) | Reference                                                       |
|------------------------------------------------------------------|--------------------|------------------------|-----------------|-----------------------------------------|-----------------------------------------------------------------|
| PVA                                                              | 1 hour<br>48 hours | 40<br>72               | 24 hours        | Almost no self-healing ability          | <i>ACS Macro Lett.</i> <b>2012</b> , 1, 1233-1236               |
| PVA-PEG                                                          | 1 hour<br>48 hours | 21<br>68               | -               | -                                       | <i>Langmuir</i> <b>2015</b> , 31, 11709-11716                   |
| PVA/(PAM-co-PAA)                                                 | 12 hours           | 37                     | -               | -                                       | <i>ACS Appl. Mater. Interfaces</i> <b>2016</b> , 8, 24030-24037 |
| PAA/Agar/PVA                                                     | 24 hours           | 72                     |                 |                                         | <i>Polymer</i> <b>2018</b> , 135, 16-24                         |
| PVA/CP                                                           | 24 hours           | 15-89                  | 24 hours        | 16                                      | <i>J. Polym. Res.</i> <b>2017</b> , 24, 127                     |
| Dopamine-based poly(vinyl alcohol)                               | 48 hours           | 20                     |                 |                                         | <i>J. Appl. Polym. Sci.</i> <b>2017</b> , 134, 45072.           |
| Thermoplastic elastomers based on hydrogen-bonding brush polymer |                    |                        | 10 hours        | ~46                                     | <i>Nat. Chem.</i> <b>2012</b> , 4, 467-472                      |
| <b>PVA/MoS<sub>2</sub></b>                                       | 3-4 min            | 91.8                   | 24 hours        | 60.6                                    | <b>Our work</b>                                                 |
